# Supplementary material
Source: PubMed Central journal article supplement (PMC4132307)
Supplement: molcell-37-7-547-supplementary.pdf [file molcell-37-7-547-supplementary.pdf]

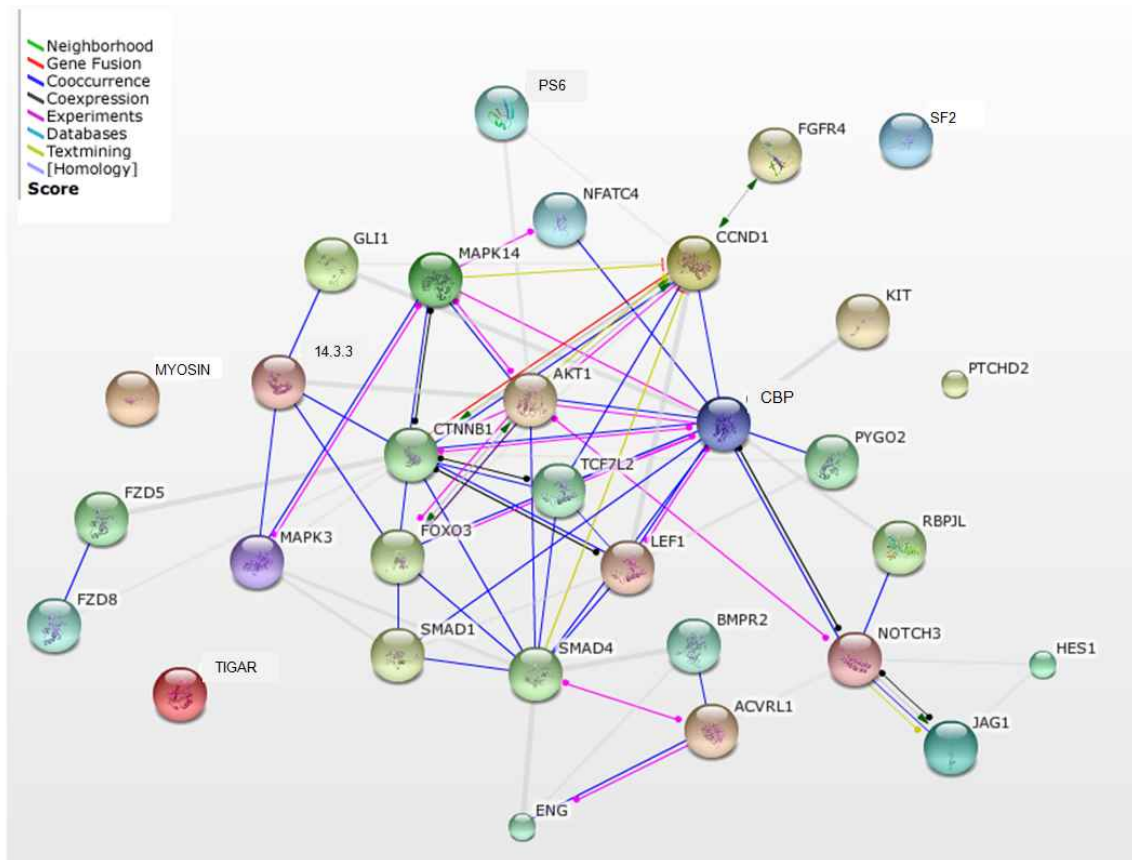

**Supplementary Fig 1**

32 gene lists from RPPA, Western, PCR array, and Real-time PCR were converted into gene symbol and used for generating interaction map using String 9.1. String 9.1 represents protein-protein interactome based on the experiments and database as well as key proteins which can be targets of Z-ajoene.
