# Supplementary material
Source: PubMed Central journal article supplement (PMC4132307)
Supplement: molcell-37-7-547-supplementary_table.pdf [file molcell-37-7-547-supplementary_table.pdf]

Supplementary table 1. PCR primers for RT-PCR and quantitative Realtime PCR

| Number | gene            | sequence                        | size |
|--------|-----------------|---------------------------------|------|
| 1      | CD133-FOR       | TGG ATG CAG AAC TTG ACA ACG T   | 133  |
|        | CD133- REV      | ATA CCT GCT ACG ACA GTC GTG GT  |      |
| 2      | Jagged 1 - FOR  | GGA GGC GTG GGA TTC CA          | 68   |
|        | Jagged 1 - REV  | CCG AGT GAG AAG CCT TTC AAT AAT |      |
| 3      | Hes 1 - FOR     | GAG CAC AGA AAG TCA TCA AAG CCT | 118  |
|        | Hes 1 - REV     | GCC GGG AGC TAT CTT TCT TAA GTG |      |
| 4      | Hes 5 - FOR     | TGG AGA AGG CCG ACA TCC T       | 65   |
|        | Hes 5 - REV     | GGC GAC GAA GGC TTT GC          |      |
| 5      | betacatenin FOR | TCA CCT GTG CAG CTG GAA TTC TCT | 146  |
|        | betacatenin REV | AGA TGG CAG GCT CAG TGA TGT CTT |      |
| 6      | cyclinD1 FOR    | CTG GAT GCT GGA GGT CTG CGA G   | 176  |
|        | cyclinD1 REV    | GCC GTC AGG GGG ATG GTC TC      |      |
| 7      | Ptch1 - FOR     | CTC TGG AGC AGA TTT CCA AGG     | 117  |
|        | Ptch1 - REV     | TGC CGC AGT TCT TTT GAA TG      |      |
| 8      | Gli1 - FOR      | CCC AAT CAC AAG TCA GGT TCC T   | 84   |
|        | Gli1 - REV      | CCT ATG TGA AGC CCT ATT TGC C   |      |
| 9      | GAPD FOR        | TGC ACC ACC AAC TGC TTA GC      | 87   |
|        | GAPD REV        | GGC ATG GAC TGT GGT CAT GAG     |      |
